# Supplementary material
Source: PubMed Central journal article supplement (PMC2935259)
Supplement: NIHMS225850-supplement-Holman_Suppl.pdf [file NIHMS225850-supplement-Holman_Suppl.pdf]

# Mechanistic Investigations of Human Reticulocyte 15- and Platelet 12-lipoxygenases with Arachidonic Acid<sup>†</sup>

*Aaron T. Wecksler,<sup>1</sup> Cyril Jacquot,<sup>2</sup> Wilfred A. van der Donk,<sup>2,\*</sup> and Theodore R. Holman<sup>1,\*</sup>*

## Supporting Information

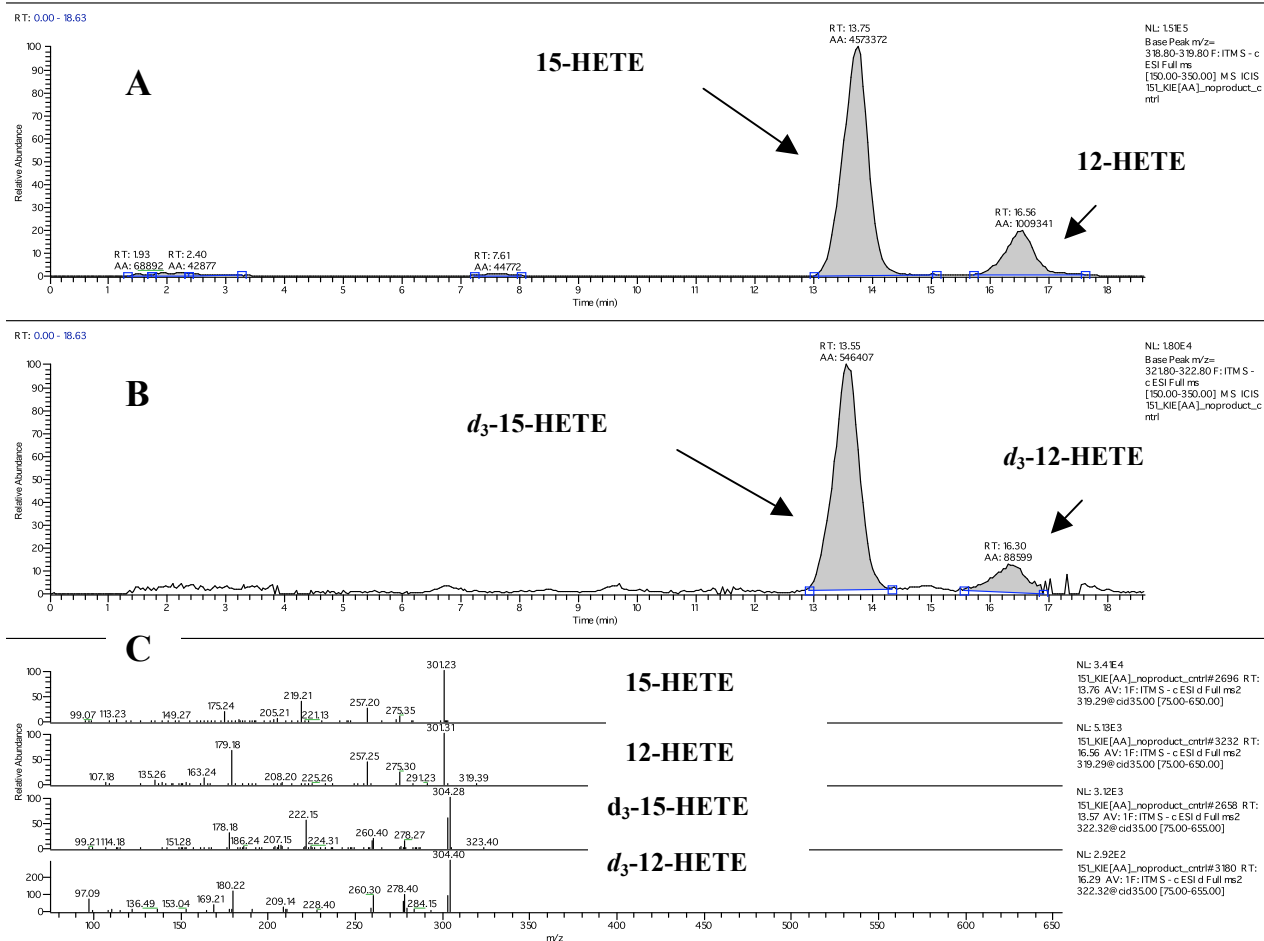

**Figure S1.** Chromatogram of the competitive KIE[AA] experiment for 15-hLO-1 using LC-MS/MS. Total Ion Count (TIC) chromatogram for protiated 15-HETE (319.3 m/z) and 12-HETE (319.3 m/z) (Panel A) and deuterated 15-HETE ( $d_3$ -15-HETE) (322.3 m/z) and 12-HETE ( $d_3$ -12-HETE) (322.3 m/z) (Panel B). Products were generated from a (1:1) mixture of  $d_4$ -AA:H-AA, and a single deuterium atom was abstracted during catalysis. Fragmentation patterns of all products (Panel C). Note: trace amounts of  $d_3$ -deuterated AA can be seen at 303.3 m/z for both deuterated products, however, the total amount of  $d_3$ -deuterated AA is less than 1% of total deuterated substrate, and has a negligible effect on the determined KIE.  $Dk_{cat}/K_m$  is determined using the ratio of the protiated/deuterated calculated areas: C13 KIE = (15-HETE/ $d_3$ -15-HETE) and C10 KIE = (12-HETE/ $d_3$ -12-HETE). All enzymatic assays were run in at least triplicate, using 25 mM Hepes buffer (pH 7.5).
